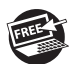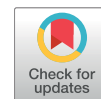

# Errata

**Erratum. Regression to Normal Glucose Regulation in American Indians and Alaska Natives of a Diabetes Prevention Program. Diabetes Care 2019;42:1209–1216**

<https://doi.org/10.2337/dc19-er10>

*Katherine A. Pratte, Ann Johnson, Janette Beals, Ann Bullock, Spero M. Manson, and Luohua Jiang, and the Special Diabetes Program for Indians Diabetes Prevention Program*

In the article listed above, the  $P$  values ( $P = 0.008$ ) in the legends for Tables 1 and 2 were corrected to read  $P \leq 0.008$ . The online version of the article (<https://doi.org/10.2337/dc18-1964>) has been corrected to reflect these changes.

**Erratum. SGLT2 Inhibitors in Combination Therapy: From Mechanisms to Clinical Considerations in Type 2 Diabetes Management. Diabetes Care 2018;41:1543–1556**

<https://doi.org/10.2337/dc19-er10a>

*Michaël J.B. van Baar, Charlotte C. van Ruiten, Marcel H.A. Muskiet, Liselotte van Bloemendaal, Richard G. IJzerman, and Daniël H. van Raalte*

In the article cited above, Fig. 3 was replaced. The data in the HbA<sub>1c</sub> (%) panel under 8.9 baseline was corrected. The online version of the article (<https://doi.org/10.2337/dc18-0588>) has been corrected.
